# Supplementary material for: A new 12-gene diagnostic biomarker signature of melanoma revealed by integrated microarray analysis
Source: PeerJ. 2013 Mar 5;1:e49. doi: 10.7717/peerj.49 (PMC3628745; doi:10.7717/peerj.49)
Supplement: Table S1 [file peerj-01-49-s001.xlsx]

## Sheet: Sheet1
Study	Gene No of metastatic melanoma signatures	Summary	Data Access No of GEO/ArrayExpress
Hoek et al, 2004	589	normal melanocytes compare to metastatic melanoma cell	GSE4570
Haqq et al, 2005	19	early stages ( skin, novi and primary) compare to metastases type I & type II
Smith et al, 2005*	94	early melanoma(NS,BN,MIS) compare to advanced melanoma(VGP,MGP,MGP positive lymph nodes)	GSE4587
Okamoto et al, 2005	20	Five malignant melanoma cell lines	GSE1845
Mandruzzato et al, 2006	70	stage III & stage IV melanoma to identify genes associated with patient survival	E-TABM-1,2,4
Winneperninckx et al, 2006*	235	CMM without metastasis compare to CMM with metastasis
Alonso et al, 2007	243	CMM without metastasis compare to CMM with metastasis
Jaeger et al, 2007	308	primary melanomas compare to melanoma metastases
John et al, 2008	21	stage IIIb and stage IIIc melanoma poor-prognosis compare to good-prognosis	E-TABM-403
Riker et al, 2008	66	primary melanoma compare to metastatic melanoma	GSE7553
Bogunovic et al, 2009	209	genes of 44 metastatic melanoma samples are significantl associated with post-recurrence survival	E-TABM-403
Jeffs et al, 2009	96	higher MITF in melanoma progression compare to lower MITF in melanoma cell lines	GSE16249 & GSE16404
Koh et al, 2009**	14 of 36	nevus compare to melanoma
Kashani-Sabet et al, 2009	5	nevus compare to melanoma
Kabbarah et al, 2010	30	primary melanoma compare to metastatic melanoma	GSE7606
Scatolini et al, 2010	455	vertical growth phase melanoma compare to metastatic melanoma	GSE12391
* 94 and 235 are numbers of gene, respectively corresponding to 100 and 254 microarray probe-sets.
**14 of 36 signatures were listed in Kohn et al. (2009) though it indicated 36 genes were identified.
CMM: cutaneous malignant melanoma
