# Supplementary material for: A new 12-gene diagnostic biomarker signature of melanoma revealed by integrated microarray analysis
Source: PeerJ. 2013 Mar 5;1:e49. doi: 10.7717/peerj.49 (PMC3628745; doi:10.7717/peerj.49)
Supplement: Table S2 [file peerj-01-49-s002.xlsx]

## Sheet: Sheet1
Hoek et al, 2004	Smith et al, 2005	Haqq et al, 2005	Okamoto et al, 2005	Winnipennickx et al, 2006	Mandruzzato et al, 2006	Alonso et al, 2007	Jaeger et al, 2007	John et al, 2008	Riker et al, 2008	Bogunovic et al, 2009	Kashani-Sabet et al, 2009	Koh et al, 2009	Jeffs et al, 2009	Scatolini et al, 2010	Kabbarah et al, 2010
ABCB9	1553502_at	ALOX5	AKT1	3.8-1	ADAMTS5	ANLN	ABCA12	ARFRP1	AKT3	AADAT	ARPC2	DLC1	ABCC2	A_23_P11644	AKAP9
ABCF2	1558496_at	COL3A1	BMI1	A_23_P21882	ARHGAP15	APLP2	ABCC3	CHST4	AQP3	ABHD7	FN1	FABP7	ACOX2	A_23_P120644	ASNS
ACADS	1564333_a_at	COL6A3	CDK6	A_24_P110601	AXIN2	CD63	ABHD2	GTPBP2	ASAH3	ADAMDEC1	RGS1	GPX3	AGPAT6	A_23_P140454	ASPM
ACVR1	212225_at	FBLN2	CTNNB1	A_24_P119094	BAS1	CDH10	ABHD9	HLA-E	BCL2A1	AGXT2L1	SPP1	GSTM2	AKR1C1	A_23_P247	BAT1
ADAM12	217258_x_at	GPD1	E2F1	A_24_P178643	BCHE	CDH2	ABLIM1	IDH1	BIRC5	AKT2	WNT2	HAL-B	AKR1C2	A_23_P63521	BIRC5
ADCY2	226397_s_at	HLA-DQB1	GPNMB	A_24_P245108	BNC2	CLIC4	ADAM12	IGKC	BUB1	AMICA1		HLA-A	AP1S2	A_24_P139761	CALU
ADM	228854_at	HLA-DQB2	GPRK7	A_24_P349896	BTK	CSPG2	ADCY2	ITPA	C16orf34	ANGPT4		L1CAM	APOBEC3G	A_24_P290087	CBR3
ADRB2	229937_x_at	HPS1	KBRAS2	A_24_P358215	C14orf109	CTSB	AHNAK	KCNIP2	C19orf33	ANLN		LCP2	APOE	A_24_P324506	DANJB9
AI557319	230413_at	IGFBP7	LDB2	A_24_P384200	C14orf117	CX3CR1	AIM1	KIAA0353	CASZ1	AP1S1		NACA	ASAH1	A_24_P820302	HCG2P7
AIM1	231597_x_at	KITLG	LIMK1	A_24_P392505	C20orf129	DSG2	AIM1L	KIAA1067	CD24	ARC		PHACTR1	BCHE	A_24_P911973	IFRD1
ALCAM	239239_at	LUM	MAPK1	A_24_P409661	CD2	EDN2	AKR1B10	LOC143712	CDC45L	ARHGAP30		PRAME	C1orf21	A_32_P128399	IMP-3
ALDH1A1	239572_at	PDGFRA	MEL	A_24_P41530	CD53	EDNRB	AKR1C1	MFGE8	CDK2	ATAD2		PTN	C20orf108	A_32_P16989	KIAA0877
ALDH1A3	244384_at	RBP1	MP1	A_24_P418517	CDID	EMP1	AKR1C2	MRPS5	CSAG2	AZGP1		RPL12	C5orf13	A_32_P224345	LSM5
ALDH2	AGR2	S100A2	MUC18	A_24_P58759	CDW52	ENC1	ALDH2	MTCH2	CTH	BRS3		Stat1	C6orf192	A_32_P4882	MET
ALEX1	AK022914	TMP21	NRCAM	A_24_P753760	CHEK1	FGG	ALDH3B2	NFKBIB	DUSP4	BTG4			CAPN3	A_32_P66570	NPTX2
ALEX2	ALOX15B	ZNFN1A5	PBX3	A_24_P856273	CSPG4	FZD1	ANK3	N-MYC EXON 3	DUSP6	BTLA			CHCHD6	A_32_P69136	PEG10
AMIGO2	AP1S2	CXCL1	RAB22A	A_24_P858698	CST1	H2-ALPHA	ANXA8	OSIL,A170,P62B	ELOVL4	C12orf35			CPN1	A_32_P918263	PEX1
ANGPT1	ASAH3	NCOA3	RAB38	A_24_P937691	DAF	HMMR	AP1G1	PILRA	FGFR3	C12orf50			CRISPLD1	A_32_P96036	PILRB
ANK3	ATAD3A	PHIP	SNK	A_32_P130536	DCT	ITGAV	AQP3	PLXNB2	FLG	C13orf3			CSRP1	AADAC	PRKCA
ANKRD28	ATAD3B		STK4	A_32_P210168	DHFR	LUM	AREG	TXNDC5	GATA3	C16orf59			CTNNAL1	AB014599	PSPH
ANPEP	BCL2A1			A_32_P231493	DUSP5	MASA	ARHGEF4		GPR19	C18orf24			CTSH	AB018273	RPA3
ANXA1	C1P3			ALDH3A2	EFHD1	MFAP1	ASPA		GYPC	C20orf118			CYR61	AB040151	SCAP2
AP1S1	CA6			ANLN	ELF4	MMP2	ASS		HAS3	C21orf130			D4S234E	AB040955	SFRP4
APLP1	CHST11			ARF4	EST	PAPPA	BBOX1		HEY1	C5orf22			DCT	AB046844	SGCE
APOC2	CIDEA			ASPM	FDFT1	PCDH9	BCL11A		HOXA10	C5orf29			EBF2	AB048287	SLC26A4
APOD	CITED1			ATAD2	GJB2	PFN1	BCL11B		HR	C6orf57			EDNRB	AB058697	TFPI2
APOL6	CKS2			BCO12204	GZMK	PRKCA	BGN		ICEBERG	CASP2			ERRFI1	AB067484	TM4SF13
ARGBP2	CLIC4			BIRC5	HCLS1	RAB1A	BICD2		IVL	CCDC138			GALM	AB067508	VGF
ARHGAP6	CSAG2			BM039	HLA-DQA1	RAN	BMP7		KIFC1	CCDC142			GBP1	AB083038	WBSCR20B
ARHGEF3	CYP4F8			BRRN1	HLA-DRA	RRAGA	BTG1		KLK7	CCDC4			GLIPR1	AB095939	WBSCR20C
ARL7	DCD			BUB1	HLA-DRB1	SDCBP	C1orf106		KRT15	CCIN			GNPTAB	ABHD5
ASC	DESC1			C10orf3	HLA-DRB4	SEPP1	C1orf116		KRT16	CCL19			GPNMB	ACPP
ASNS	DF			C15orf23	HNRPU	SERPINA3	C20orf42		KRT17	CCR7			GPR143	ADAMTS5
ASXL1	ELOVL3			C22orf9	IGLC2	SMARCA1	C2orf26		KRT6B	CD2			GSTP1	ADK
ATP1B1	FA2H			C9orf40	IGLL1	SPA17	C9orf3		LGALS7	CD27			HIF1A	AF026246
ATP2B1	FCGR1A			CA5B	IL4R	SPARC	CA12		LOR	CD3D			HS3ST3A1	AF086216
ATP5I	FGFR2			CCNB1	ITK	TUBA1	CA2		LTB4R	CD48			IFT57	AF086289
BAALC	FLJ31052			CCNB2	JUNB	TUBA2	CALML3		MAGEA12	CD69			IFT81	AF086541
BACE	FLJ32569			CCT4	KIAA1026	TUBA3	CALML5		MAGEA2	CD7			IGFBP6	AF103691
BAG2	G1P2			CCT5	KMO&OPN3	TUBB3	CCL27		MAGEA3	CD79A			INHBA	AF113013
BATF	GABRP			CCT7	LAPTM5	WNT2	CCRL1		MAGEA5	CDH2			INPP4B	AF143325
BAX	GAL			CD1A	LOC91316	CCBP2	CD207		MAGEA6	CDK2			IQCG	AF145385
BBF2H7	GDF15			CD1C	LTB	CXCL12	CD24		MMP14	CGREF1			JUN	AF161505
BBS1	GPD1			CD1E	LYZ	IFITM2	CDA		MMP19	CLEC4G			KYNU	AF251079
BCAN	GPR158			CDC2	MAPK13	MAGEA6	CDC6		MUC15	CLECL1			LGALS3	AF274957
BCMP1	GPR19			CDC45L	MCM3	ACADM	CDH1		PDGFRL	CPB2			LOC57228	AF283301
BDNF	GREB1			CDC6	M-RIP	ACSL3	CDH3		PEG10	CPN1			MGLL	AF384161
BEX1	GRIK2			CDCA1	MYH10	ADK	CDS1		POU2F3	CRIP1			MITF	AF481738
BGN	HAO2			CDCA5	MYO10	ADSL	CENPF		RAB25	CRLF2			MLANA	AF498946
BIK	HSD3B1			CDCA8	NALP1	AK3L1	CENTD1		RASGRF1	CSF2RB			MREG	AGA
BPAG1	HTPAP			CDKN3	NCF4	AKR7A2	CFH		RGS20	CXCL1			NFE2L3	AJ272205
BST2	HTR2B			CDON	NEO1	ALDH1A2	CHN2		RORA	CXCL13			NP	AK001081
BTEB1	IGSF9			CEBPA	NFKBIZ	ATP5L2	CKMT1B		SCEL	CYP27B1			NRP1	AK001581
C11orf4	IMAGE:5580856			CENPA	P15RS	ATP6V0B	CKS2		SFN	CYP51A1			PEX13	AK002085
C16orf30:	KCNK7			CENPF	PARVA	ATP6V0D1	CLCA2		SLC16A4	DKFZp686O1327			PIR	AK021696
C1orf29	KDELR3			CGI-12	PIM2	CA9	CLIC3		SOX5	DLG5			PLAUR	AK021744
C1S	KHDRBS3			CHEK1	PLEK	COX6B1	CLTB		SPP1	DLX1			PRKD3	AK022912
C20orf18	KIF23			CHORDC1	PRKCE	COX8A	COBL		SPRR1A	DNAH14			PROS1	AK024473
C21orf25	KRT15			CKS1B	PYGL	CYP19A1	COL17A1		SPRR1B	DNASE1L3			PSCA	AK025603
C7orf14	KRT1B			CKS2	RAC2	CYP7B1	COL4A6		ST7L	DTX3L			PTPLA	AK026275
CACNA1A	KRT6IRS			CLASP1	RGS12	DCK	COL7A1		STAR	ESM1			RAB21	AK026517
CALD1	KRT6L			CLECSF13	SLC16A1	ENO1	CPA3		TMPRSS4	EXO1			RAB27A	AK026697
CALU	LOC283027			CLG	SOD2	GGH	CSAG2		TP73L	FAM113B			RAB38	AK026839
CAP2	LOC389048			CLIC3	SOX8	GLO1	CST6		TRIM51	FAM126A			REPS2	AK056421
CAPG	LY96			CML66	STK39	GSTA4	CSTA		TYMS	FAM40B			RHBDF1	AK057704
CAV1	LYPD1			CNN3	SVIL	HIBADH	CTNNBIP1			FCAMR			ROPN1	AK074567
CBR1	MAD2L1			CREM	TMSB4X	IDS	CTNND1			FCER1A			RP11-388M20	AK075271
CBR3	MGST1			CRY2	TNFAIP3	LIPA	CTSG			FCRLB			RP11-467E3	AK091836
CCL18	NRP2			CST3	TRA?	LRPAP1	CXADR			FGFBP2			RP11-511B7	AK093908
CCL2	PHACTR1			CST5	TRIM32	MDH1	CXCL14			FKBP10			RP1-93H18	AK095258
CCL20	PIP			CTNNAL1	UBD	MGC4172	CYP26B1			FLJ30375			S100A16	AK095491
CCL4	PLP1			CTNNBIP1		NDUFAB1	DDAH1			FLJ45803			S100A4	AK095707
CCS	RAD51AP1			CXCL14		NDUFB11	DEFB1			GABBR1			S100B	AK096403
CDC20	RaLP			CXorf36		NDUFB3	DGKA			GBP2			SDCBP	AK096975
CDC42EP1	RORA			DC6		NPC2	DIO2			GJA3			SEC11C	AK097948
CDH1	SAH			DCBLD2		PAICS	DNASE1L3			GPR18			SERPINE1	AK098314
CDH2	SCG2			DCC1		PFKM	DPP6			GPR85			SGCD	AK123230
CDH3	SCGB1D2			DDX18		PMM1	DSC1			GPSM3			SILV	AK124173
CEACAM1	SCGB2A2			DHFR		PRDX5	DSC2			GVIN1			SLC45A2	AK124776
CEB1	SERPINB5			DHRS1		SCD	DSC3			GZMK			SNCA	AK125038
CEBPD	SH3GL3			DKFZP547E1010		SDHD	DSG1			HBA1//HBA2			SORT1	AKR1B10
CECR1	SORT1			DKFZP564F0522		SLC25A17	DSG3			HES1			ST3GAL6	AL050204
CED-6	SPP1			DLG7		SLC30A6	DSP			HLA-DOB			ST6GALNAC2	AL050376
CGI-14	STARD3NL			DNAJA1		TXNRD1	DST			HLA-DPB1			STK17A	AL117481
ChGn	STCH			DONSON		VKORC1	DUOX1			HSH2D			TGFBI	AL137506
CHL1	SULF1			DPYSL2		YWHAQ	DUSP7			HSPA4L			TIMP2	AL137761
CHMP1.5	TDO2			DTYMK		ARID5B	ECHDC2			HSPB3			TMC6	AL359062
CHST6	THRSP			ECT2		ASH2L	EFS			HYDIN			TNFRSF14	AL359620
cig5	TM4SF11			EMX2		BTF3	EGFR			ICOS			TRIM63	AL512727
CIP98	TNC			EMX2OS		BZW1	EHF			IGLL1			TSPAN5	AL832084
CIRBP	TNXB			EXO1		CBFB	ELMO3			IKZF1			TYR	AL832427
CITED1	TOPK			F10		CDYL	ENPP1			IL2RG			TYRP1	AL833303
CITED2	UPP1			FAM33A		FOXO1A	ENPP2			IL4R			UBL3	ALDH2
CKIP-1	WIF1			FLJ10006		GTF2H2	EPHB6			INPP5D			VCAN	ANXA2
CKMT1				FLJ10038		HIST1H3D	EPPK1			IRF1			WIPI1	ANXA8
CNOT4				FLJ10330		HIST1H4B	EPS8			IRF8			ZNF362	ANXA9
COL10A1				FLJ10858		HIST1H4C	ETS2			ITGA7				APCDD1
COL13A1				FLJ20641		KLF10	EVA1			ITGAL				AQP3
COL16A1				FLJ20989		MAP4K3	EVPL			ITGB2				AQP9
COL1A2				FUSIP1		NCOA4	F2RL1			JAZF1				AREG
COL4A5				GEMIN6		NOLA2	FAT2			KCNE1				ARG1
COL5A1				GJA7		OLIG2	FCER1A			LAMA1				ARL4A
COL5A2				GLRX2		POLR3K	FCGBP			LCK				ASPM
COL6A1				GMNN		RBM4	FGFBP1			LDHAL6B				ATP6V1D
COL6A2				GMPS		REST	FGFR2			LGI2				AY039759
COL6A3				H2AFV		RNASE4	FGFR3			LILRA4				AY358692
COL9A3				HCAP-G		TCEB1	FHOD3			LMTK3				BAX
COX7A1				HLA-DQB1		TRIP3	FLG			LOC144571				BBOX1
CREM				HOXA9		XRCC5	FLJ13841			LOC154092				BC004317
CRMP1				HSPA4		CCT5	FLJ21511			LOC157931				BC004792
CRYL1				HSPA5		EIF3S3	FN1			LOC283514				BC008810
CSF1				HSPC150		EIF5	FST			LOC283663				BC012609
CSPG2				HSPD1		GC20	FXYD3			LOC283692				BC017048
CST2				HSU79297		HSPA8	FZD10			LOC283711				BC018063
CST7				HUMGT198A		MRPL15	GABRE			LOC286440				BC018706
CTGF				IMMT		MRPL37	GATA3			LOC339562				BC019932
CTSF				KCTD11		MRPS22	GJA1			LOC474358				BC021247
CTSH				KDELR2		RPL10A	GJB3			LOC645249				BC027707
CUGBP2				KIAA0514		RPL35A	GNA15			LRIT1				BC031645
CXCL1				KIAA1765		RPS10	GPI			LRRTM1				BC032480
CXCL10				KIAAD101		SECISBP2	GPR109B			LTB				BC032828
CYR61				KIF11		UBE2D2	GPR87			MAP3K12				BC033310
D2S448				KIF2C		UBL5	GPX2			MAP7D2				BC033366
D4S234E				KIRREL		VBP1	GRHL2			MBL2				BC034616
DAF				KNTC1		AKAP13	GSTT1			MCM4				BC036399
DBY				KNTC2		C11orf15	H2AFV			METTL7B				BC036550
DCN				KPNA2		CAV1	HAL			MGAT5B				BC036762
DDAH1				KRTAP19-1		CGA	HCAP-G			MMP13				BC041336
DDB2				LGALS2		CGI-141	HLF			MMP8				BC044933
DEPP				LOC146909		DUSP12	HOP			MOCS3				BC062776
DHCR7				LOC203547		EPS15	IGHM			MOXD1				BC063641
DJ971N18.2				LRAP		GABARAP	IL1R2			MSTN				BF109232
DKFZp566O084				LSP1		GIMAP6	IMPA2			MYADM				BLM
DLG1				LTB		GNG12	IRF6			MYCBP2				BNC1
DLX2				MAP4K4		GRB2	IRX4			NEFM				BQ186674
DOK5				MCM4		IDE	ITGB4			NFKBIA				BSPRY
DPP4				MCM6		IGFBP1	ITM2A			NID1				BUB1B
DSCR1				MELK		IL1RL1	ITPR3			NLRC3				BX648207
DSP				MGC12197		MAL	IVL			NLRC5				C10orf3
DTR				MGC14560		MYB	JAG1			NPY1R				C14orf11
DUSP6				MGC17330		NME2	JUP			NUSAP1				C14orf29
EEF1A2				MGC17337		NTF5	KIF2C			OPHN1				C1orf8
EFEMP1				MGC17337		PC4	KIT			ORC1L				C20orf42
EFHD1				MGC17839		PDE5A	KLF4			OSBPL6				C6orf105
EIF1AY				MGC20460		PGR1_GPR153	KLF5			P2RY10				C6orf85
ELSPBP1				MGC4308		PPP1R3C	KLK10			P2RY8				CA2
EMS1				MGC5395		PPP1R8	KLK11			PBK				CCDC3
ENIGMA				MRPL30		PPP2CB	KLK7			PDE4D				CCL13
ENPP1				MRPL32		PPP2R5C	KLK8			PEG10				CCL18
EPHA3				MRPS10		PRKAR1A	KLRF1			PGK1				CD24
ERBB3				MRPS16		PTPRZ1	KRT1			PITX3				CD36
ERCC1				MRPS17		RABAC1	KRT10			PLEK				CD44
ERP70				MRPS5		S100A10	KRT14			PNOC				CDC42
ESDN				MSH6		SEC5L1	KRT15			POPDC3				CDC6
ETV4				MTB		SHB	KRT16			PPP1R16A				CDCA7
EVC				NANS		SRI	KRT17			PRB1				CDH1
FACL3				NASP		STK24	KRT19			PRKDC				CDH13
FADS3				NCBP1		TGFBR2	KRT23			PSAT1				CELSR1
FARP2				NCOA6		TIMM10	KRT5			PSMB8				CENPF
FASN				NEK2		WBP5	KRT6A			PSPH				CENTB5
FAT				NME1		AKT1S1	KRT6B			PTGDS				CLCA2
FCGRT				NPM1		C11orf10	KRTHA1			PTGER2				COL10A1
FDX1				NUDT4		C14orf142	KRTHA3A			PTPN6				COL11A2
FEZ1				OGG1		C17orf32	LAD1			PUS7				COL13A1
FGF13				P116		C21orf4	LAMA3			RASGRP2				COL17A1
FKBP1B				P2RY14		C2orf25	LAMB3			RASSF5				COL4A6
FLJ10159				PAICS		C2orf28	LAMC2			RASSF6				CRABP2
FLJ10178				PARK2		C3orf10	LGALS7			RBP5				CST6
FLJ10377				PCDH17		CGI-119	LGR5			SASH3				CSTA
FLJ10851				PCNA		CHC1L	LISCH7			SATB1				CSTB
FLJ11000				PCP4		CHCHD1	LOC440607			SCN3A				CTSL2
FLJ11286				PDGFB		CHCHD2	LOC63928			SEMG2				CXADR
FLJ12150				Pfs2		DKFZP564J0863	LOR			2012-09-01				CXCL14
FLJ12584				PHF14		DKFZP564O0463	LPPR4			SIRPG				D17427
FLJ14675				PLEKHC1		EPB41L3	LTB4R			SKAP1				DDX11
FLJ20152				PLOD2		FHL1	LTF			SLC22A13				DEFB1
FLJ20399				PRC1		FLJ10099	LY6D			SLC45A2				DEFB103
FLJ20637				PRIM2A		FLJ11305	LYPD3			SPC24				DEGS
FLJ20716				PROM2		FLJ90709	MAF			SPINK2				DGCR6L
FLJ21839				PRSS25		GHITM	MAGEA12			SPOCK2				DHCR24
FLJ22021				PTD004		hAA3914	MAGEA3			ST6GALNAC3				DHX9
FLJ23441				PTTG1		hAA4295	MAGEA6			STAG3L4				DLEU2
FLJ23510				PTTG2		hAA8156	MAL			STT3A				DNCL1
FN1				PWP1		hAB1016	MAP7			TAP1				DSC1
FOXD1				RACGAP1		hAB2224	MAPK13			TARP				DSC3
FSCN1				RAD54L		hAB7794	MAST4			TLR10				DSG1
FSD1				RAN		hAB7922	MATN2			TNFRSF10B				DSG3
FSTL1				RANBP1		hAC2217	MCOLN3			TNFRSF17				DSP
FXYD3				RANBP7		hAC2259	MERTK			TOMM34				DSTN
G1P2				RBMX		hAC9037	MET			TRAIP				DUOX1
G1P3				RFC4		hAD2160	MGC8685			TRAT1				DUSP1
GALT				RFC5		hAD7889	MID2			TRGC2				DUSP14
GAS7				RHBDL2		hAE0035	MME			TRIM54				E2F3
GBP1				RNF125		HRASLS3	MMP28			TRIP13				EFNB2
GCAT				RPA3		Hs.163813	MST1R			TTC9				EGFR
GFR				RRM2		Hs.27621	MT1M			TXNIP				EGLN3
GLDC				SH2D1A		Hs.448658	MYO6			UBASH3A				ELF5
GLS				SHCBP1		Hs.488399	NAP1L2			UGT8				ELOVL4
GMPR				SIP		Hs.496110	NCAM1			UTS2D				ENST00000276938
GNS				SMARCA5		Hs.50272	NCBP2			VAV3				ENST00000282947
GOLGIN-67				SMC2L1		Hs.533437	NEBL			VCAM1				ENST00000296448
GPM6A				SNRPG		Hs.548689	NET1			VNN2				ENST00000311197
GPR126				SPAG5		IFI44L	NFIB			WDHD1				ENST00000319119
GPR56				SPINT2		KIAA0859	NMU			WDR76				ENST00000322533
GSTP1				Spo25		KIAA1279	NNT			XKR4				ENST00000325371
GSTZ1				SRP19		LAPTM4A	NOD9			ZAP70				ENST00000329136
HDAC1				SSR3		LFNG	NRCAM			ZFP36				ENST00000331334
HDAC4				ST7OT1		LHFPL2	NTRK2			ZFP57				ENST00000332402
HEY1				STAF65(gamma)		LOC113444	NUDT9			ZNF385D				ENST00000332402
HHLA3				STK6		LOC148145	P53AIP1							ENST00000333032
HIC				STMN2		LOC286257	PAK6							ENST00000333111
HIG2				SURF4		LOC54499	PALMD							ENST00000335381
HIP1R				TAF1A		LOC91689	PAPSS2							EPHA3
HLA-DMA				TARS		LOC92689	PCDH21							EPN3
HLA-DQB1				TCOF1		LRRC2	PCSK2							EREG
HLA-DRA				TIMELESS		MGC4399	PDZK1IP1							F11R
HLA-DRB1				TK1		MGC5370	PER2							FABP5
HLA-DRB4				TNA		RGPD1	PERP							FCER1A
HLA-3				TOM1L2		SPC12	PI3							FGFR3
HMGA2				TOP2A		TCOF1	PKP1							FOXQ1
HMGCL				TPM4		TDE2	PKP3							FTS
HNMT				TRUB2		TMEM16F	PLOD2							GJA1
HOXB13				TXNIP		TMEM32	PLP2							GJB2
HOXB2				TYMS		APEX1	PLXNC1							GJB6
HOXB7				UBPH		BCCIP	POU2F3							GPR109B
HOXD1				UGCGL1		BCL2L10	PPL							GPR87
HPS1				UHRF1		CASP5	PRDX2							HMMR
HRASLS				WHSC1		CDC5L	PRELP							HSD11B1
HSA250839				XCL1		CDKN1A	PRSS3							HSPD1
HSPA1A				XM_293671		CKS1B	PRSS8							HTATIP2
HSPG2				XM_372200		CYC1	psMAGEA							ID1
ICB-1				XPO1		DAD1	PTCH							IL18
ID1				ZCSL2		FAIM	PTGS1							IL1F5
ID2				ZNF367		HBXIP	PTPRZ1							IL1F7
IDS				ZWINT		KIF11	PYCARD							IL1F9
IFI27						MAPRE1	QPCT							IL1R2
IFI35						PMP22	RAB25							IL22RA1
IFI44						SET	RAMP							IMPA2
IFIT1						SKP1A	RAPGEFL1							IRX2
IFIT2						TOB2	RBM35B							IRX4
IFIT4						TP53I3	RICS							JUB
IFITM2						VDAC1	RORA							KIAA0125
IFRG28						WEE1	RRM2							KLF5
IGF1							RUVBL1							KLK10
IGFBP2							S100A14							KLK11
IGFBP3							S100A2							KLK5
IGFBP5							S100A7							KLK7
IGFBP6							S100A8							KLK8
IGSF4							S100A9							KNTC1
IL1B							S100P							KRT14
IL1R1							SCEL							KRT15
IL1RAP							SCGB2A2							KRT16
IL24							SCHIP1							KRT17
ILKAP							SCNN1A							KRT23
INHBA							SCUBE2							KRT2A
INSIG1							SDC1							KRT5
IRF7							2012-09-06							KRT6A
ISG20							SERPINB13							KRT6B
ISGF3G							SERPINB3							KRT6E
ITGA4							SERPINB4							KRTHA3A
ITGA6							SERPINB5							L01090
ITGA7							SFN							L20815
ITGB3							SLAC2-B							LAD1
ITGBL1							SLC16A3							LAMA3
ITM2A							SLC1A4							LAMB3
ITPKB							SLC2A1							LAMC2
ITPR1							SLD5							LAMP3
ITPR3							SLP1							LASS3
KCNN4							SMARCA2							LDLR
KIAA0133							SMARCA3							LGALS7
KIAA0329							SMC4L1							LGI3
KIAA0476							SNAP25							LOR
KIAA0495							SOX15							LRP10
KIAA0746							SPINK5							LSS
KIAA1102							SPINT2							LY6D
KIAA1199							SPP1							LY6G6C
KLF2							SPRR1A							M21539
KRT18							SPRR1B							M59979
KYNU							SRD5A1							M60502
LAMA4							SSH3							MAGEA10
LAMC2							ST14							MAN1B1
LCP2							STAP2							MAP1LC3B
LDOC1							STC1							MAPK13
LIF							STK6							MGST1
LIMK2							SULF1							NDUFS4
LMAN1							TACC3							NEDD4L
LOC254531							TACSTD2							NIPSNAP3A
LOC51066							TBC1D1							NM_005130
LOC51157							TFAP2B							NM_005764
LOC51693							TFAP2C							NM_006088
LOC56898							THBD							NM_006393
LOC90141							THBS4							NM_014181
LOX							TM4SF1							NM_014278
LOXL1							TMEM45A							NM_014839
LPHH1							TP73L							NM_016448
LPXN							TPD52L1							NM_016448
LRP16							TPSAB1							NM_017915
LSAMP							TPSB2							NM_017918
LUC7A							TRIM29							NM_017933
LUM							TUBA1							NM_018004
LXN							TUFT1							NM_018265
LYPLA3							TXNIP							NM_018712
MADH7/ SMAD7							TYRP1							NM_019060
MAFB							UCHL1							NM_019612
MAFF							VSNL1							NM_021180
MAGEA1							WNT5A							NM_021831
MAGEA12							ZBED2							NM_021992
MAGEA2b							ZNF185							NM_022097
MAGEA3														NM_024702
MAGEA5														NM_024829
MAGEA6														NM_024921
MAGEC1														NM_024921
MAN2A2														NM_032323
MAP2K5														NM_032330
MAP3K12														NM_032413
MAP7														NM_032658
MC1R														NM_032867
MCF2L														NM_033317
MCP														NM_053045
MDA5														NM_058173
MEIS2														NM_138788
MERTK														NM_138799
MET														NM_138969
MGC10771														NM_139211
MGC2477														NM_144668
MGC29643														NM_144698
MGC35048														NM_144717
MIA														NM_145018
MLPH														NM_145175
MLSTD1														NM_145263
MLYCD														NM_152792
MME														NM_153264
MMP11														NM_173083
MPPE1														NM_173352
MRPL44														NM_178353
MSC														NM_178428
MT1E														NM_178433
MX1/IFI78														NM_182507
MX2														NM_182573
MYD88														NM_198485
MYL5														NM_199511
MYL9														NM_207365
MYLE														NM_207392
MYOZ2														NMU
NAB1														NR_001296
NACSIN														NR_001446
NBL1														OPTN
NCOA3														OVOL1
NDN														PARD6G
NDUFS7														PCSK2
NEDD9														PEO1
NET-6/TM4SF13														PERP
NGFR														PHPT1
NMI														PIK3C3
NNMT														PKP3
NOTCH 2														PNRC1
NP														POU2F1
NPAS2														PPP1R7
NPC1														PPP6C
NRCAM														PRC1
NRN1														PRKC1
NRP1														PSMA6
NTT73														PTPN3
NUP153														PTPRF
NUP50														RAB2
NY-REN-34														RAD54B
OA1														RAD54L
OA48-18														RHBDL2
OAS1														RLBP1
OAS2														RNH
OAS3														RORA
OASL														RRS1
OCA2														S100A10
OLFM1														S100A14
OSBPL10														S100A2
OSBPL3														S100A7
OTUB1														S100A8
P2Y5														S100A9
P4HA1														S100P
PCBP4														S73288
PCDH7														S80262
PCLO														SARA2
PCOLCE2														SCA2
PDGFC														SCEL
PDIP1														SCRN2
PDP														SDC1
PEG10														SERPINB13
PENK														SERPINB3
PGLS														SERPINB7
PGRMC1														SFRS7
PGRMC2														SGPP2
PHLDA1														SIRT5
PIG3														SKP1A
PILR(BETA)														SLC2A1
PKP4														SLCO2A1
PLA1A														SLP1
PLA2G4C														SMARCC2
PLAT														SMC4L1
PLAUR														SMPD3
PLEC1														SORL1
PLOD2														SPINK5
PLSCR3														SPINT2
PLXNB3														SPRL1B
PMX1														SPRR1B
PNMA2														SPRR2A
POGZ														SULF1
POMZP3														TACC2
PPAP2A														TACSTD2
PPAP2B														TALDO1
PPP1R3C														TFCP2L1
PPP1R7														THBD
PPP2R3A														THC1815179
PQLC1														THC1825990
PRAME														THC1827959
PRELP														THC1836380
PRKCB1														THC1848190
PRKCN														THC1877698
PRKCZ														THC1891157
PRKDC														THC1903939
PRL														THC1920560
PRNP														THC1932916
PROCR														THC1933729
PSFL														THC1945510
PSMB10														THC1945851
PSMB8														THC1946441
PSMB9														THC1946794
PSMD11														THC1970559
PTD009														THC1984145
PTD015														THC2003872
PTGS2														TIMELESS
														TMC5
PTPRF														TMPRSS4
PTPRZ1														TP73L
PTS														TRIM29
PXN														TRIM7
PYGB														TUBA1
RAB27A														TUBB
RAB31														TXN
RAB32														U17077
RAB33A														U21049
RAB38														UCHL3
RAB3A														UHRF1
RAI3														UNC93A
RAP1GA1														VAMP8
RENBP														WFDC5
RGC32														WHSC1
RGS14														X75958
RGS5														X77723
RI58														X98306
RIF1														XM_209012
RIL														XM_293018
RIN2														XM_379108
RIS1														ZNF317
RLN2														ZNF395
RNF128														ZNF587
ROCK2
RP4-781L3
RPLP2
RPS4Y
RPS6KA2
RPS9
RRAGA
RRAS
S100A1
S100A2
S100A4
S100B
SAMHD1
SCG2
SCGF
SCHIP1
SDC1
SDC2
SDC4
SDNSF
SECTM1
SELENBP1
SEMA3B
SEMA6A
SERPINA3
SERPINB2
SERPINE1
SERPINF1
SERPING1
SERPINI1
SHOX2
SIGIRR
SLC12A7
SLC16A4
SLC1A5
SLC20A1
SLC22A1L
SLC23A1
SLC26A2
SLC2A4RG
SLC38A2
SLC39A14
SLC39A4
SLC5A4
SLC7A11
SLC7A8
SMCY
SMTN
SMURF2
SNAP25
SNAPC3
SNN
SP100
SP110
SPA17
SPINK1
SPUVE
SSA1
SSX2
SSX4
STARD13
STAT1
STC2
STCH
STEAP
STK17A
STX8
STXBP2
SULF1
TAZ
TBC1D16
TBX3
TCEA2
TCF8
TCTEL1
TEB4
TEM6
TFP12
TGFBI
TGM2
THBS1
THRAP2
TIMM8B
TIMP3
TM4SF1
TMEPAI
TMSNB
TNC
TNFRSF11B
TNFRSF12A
TNFRSF21
TNNT1
TOLLIP
TPBG
TPD52
TPM1
TPM2
TPM4
TRAG3
TREM1
TREX1
TRIM14
TRIM2
TRIM22
TRIM34
TRIM9
TRIO
TRN-SR
TRPM1
TSPYL5
TST
TTC3
TUBB
TWIST1
TYR
UBE1L
UBE2L6
UCHL1
UROS
USP18
VAMP5
VAMP8
VDR
VEGF
VGF
VIL2
VIP32
VPS13D
WARS
WBSCR20B
WDR18
WFDC1
ZAP128
ZFP36
