# Supplementary material for: A new 12-gene diagnostic biomarker signature of melanoma revealed by integrated microarray analysis
Source: PeerJ. 2013 Mar 5;1:e49. doi: 10.7717/peerj.49 (PMC3628745; doi:10.7717/peerj.49)
Supplement: Table S5 [file peerj-01-49-s005.xlsx]

## Sheet: Sheet1
study	microarray data access number	normal skin	benign nevi	dysplastic nevi	melanoma in situ	vertical growth phase	metastatic melanoma
Mandruzzato et al, 2006	E-TABM-1				83
	E-TABM-2				17
	E-TABM-4				9		9
John et al, 2008	E-TABM-403						58
Riker et al, 2008	GSE7553	5			2	14	40
Jeffs et al, 2009	GSE16040						34
Kabbarah et al, 2010	GSE7606	ratio value of comparing human melanoma with normal skin for 123 samples
Rose et al, 2011	GSE22301	2			4		14
Smith et al, 2005	GSE4587	2	2	2	2	2	5
Hoek et al, 2004	GSE4570	2			1		5
Scatolini et al, 2010	GSE12391		18	11	8	15	5
