# Supplementary material for: A new 12-gene diagnostic biomarker signature of melanoma revealed by integrated microarray analysis
Source: PeerJ. 2013 Mar 5;1:e49. doi: 10.7717/peerj.49 (PMC3628745; doi:10.7717/peerj.49)
Supplement: Table S7 [file peerj-01-49-s007.xlsx]

## Sheet: Sheet1
Table s7: Novel 77 genes with original rank positions and sr values
	Genes	sr	Ranking position		Genes	sr	Ranking position		Genes	sr	Ranking position
1	CTAG1B	12.1041	5	27	DGAT2L3	8.63305	91	53	RGS4	7.81921	153
2	KRT77	11.9909	6	28	MPP7	8.54748	95	54	GRHL3	7.81518	154
3	CTAG1A	11.5687	8	29	IGHG1	8.54255	96	55	GPR115	7.80661	155
4	C4orf7	11.091	9	30	MGP	8.47684	100	56	FLJ37464	7.79278	158
5	ZIC1	10.2538	42	31	DKFZP434B061	8.45791	101	57	TMEM79	7.77272	160
6	ELMOD1	10.2261	43	32	PPP1R14C	8.44907	102	58	ZNF750	7.77219	161
7	SERPINA12	10.2166	45	33	AKR1C3	8.41269	103	59	IGHV4-31	7.75907	162
8	DMKN	10.0719	48	34	IGL@	8.36309	106	60	TP63	7.75546	163
9	C1orf172	9.98885	50	35	SCARA5	8.19895	117	61	LOC124220	7.75199	164
10	DGAT2	9.82366	52	36	SAA1	8.19743	118	62	LAMB4	7.71743	167
11	MICALCL	9.58336	54	37	RNASE2	8.19456	119	63	SCML4	7.69848	168
12	AADACL2	9.29707	60	38	SLAMF7	8.18937	120	64	CYP4B1	7.68961	169
13	IL13RA2	9.1195	64	39	SAA2	8.18393	121	65	HLA-DRB3	7.68657	170
14	FMN2	8.95611	67	40	PPP2R2C	8.16401	122	66	CHP2	7.64843	174
15	FSTL5	8.94996	69	41	ENTHD1	8.12923	125	67	MAGEA10	7.6459	175
16	EYA1	8.80726	74	42	BTBD16	8.07625	129	68	LOC285986	7.61603	179
17	ZNF749	8.80038	75	43	ANKRD35	8.06992	130	69	GAD1	7.58241	181
18	LOC730415	8.80038	75	44	HLA-DQA1	8.03516	131	70	EXPH5	7.57022	183
19	LOC100133811	8.80038	75	45	C10orf116	8.02578	132	71	TMEM154	7.56755	184
20	LOC100133661	8.80038	75	46	TKTL1	7.9537	137	72	HLA-DRB5	7.55591	186
21	LOC100133484	8.80038	75	47	C6orf218	7.94324	139	73	LOC100126583	7.54176	187
22	HLA-DRB2	8.80038	75	48	ABCA13	7.89593	142	74	SH3RF2	7.49116	192
23	IGFL2	8.77281	82	49	ATP6V1C2	7.88195	145	75	MMP1	7.48284	194
24	WNT4	8.69994	87	50	COL11A1	7.85369	148	76	FRMD5	7.4572	196
25	CAPNS2	8.6897	89	51	RSPO1	7.83611	149	77	LOC645323	7.42778	199
26	MAL2	8.64039	90	52	C1orf116	7.82384	152
